# Supplementary material for: Occurrence patterns of coral-dwelling gall crabs (Cryptochiridae) over depth intervals in the Caribbean
Source: PeerJ. 2016 Mar 10;4:e1794. doi: 10.7717/peerj.1794 (PMC4793322; doi:10.7717/peerj.1794)
Supplement: Data S1 [file peerj-04-1794-s001.xlsx]

## Sheet: Occurrences Ohyp
Locality	Depth	Agarica agaricites						Agaricia lamarcki						Agarica humilis
		colonies (n)	inh. (n)	inh. (%)	surface (m²)	O. hyp (n)	O. hyp (d)	colonies (n)	inh. (n)	inh. (%)	surface (m²)	O. hyp (n)	O. hyp (d)	colonies (n)	inf. (n)	inf. (%)	surface (m²)	O. hyp (n)	O. hyp (d)
CAR01	6 m	1	0	0	0.00394784	0	0	2	0	0	0.0178887	0	0	0	0	--	0	0	--
	12 m	0	0	--	0	0	--	2	1	50	0.0262161	1	38.1444	0	0	--	0	0	--
	18 m	0	0	--	0	0	--	4	2	50	0.206707	3	14.5133	0	0	--	0	0	--
CAR02	6 m	0	0	--	0	0	--	0	0	--	0	0	--	0	0	--	0	0	--
	12 m	0	0	--	0	0	--	0	0	--	0	0	--	0	0	--	0	0	--
	18 m	1	0	0	0.00302257	0	0	0	0	--	0	0	--	0	0	--	0	0	--
CAR03	6 m	4	0	0	0.0373811	0	0	0	0	--	0	0	--	0	0	--	0	0	--
	12 m	4	0	0	0.011165	0	0	0	0	--	0	0	--	0	0	--	0	0	--
	18 m	1	0	0	0.0061685	0	0	3	2	66.6667	0.0489779	2	40.8347	0	0	--	0	0	--
CAR04	6 m	0	0	--	0	0	--	0	0	--	0	0	--	0	0	--	0	0	--
	12 m	4	0	0	0.210223	0	0	1	0	0	0.148106	0	0	0	0	--	0	0	--
	18 m	1	0	0	0.0199859	0	0	0	0	--	0	0	--	0	0	--	0	0	--
CAR05	6 m	3	1	33.3333	0.593718	1	1.6843	0	0	--	0	0	--	0	0	--	0	0	--
	12 m	16	0	0	0.417916	0	0	0	0	--	0	0	--	0	0	--	0	0	--
	18 m	5	0	0	0.0376279	0	0	1	1	100	0.222066	2	9.00633	0	0	--	0	0	--
CAR06	6 m	0	0	--	0	0	--	0	0	--	0	0	--	2	0	0	0.00376279	0	0
	12 m	0	0	--	0	0	--	3	1	33.3333	0.174507	1	5.73043	2	0	0	0.00376279	0	0
	18 m	0	0	--	0	0	--	0	0	--	0	0	--	0	0	--	0	0	--
CAR07	6 m	1	1	100	0.130526	1	7.66134	0	0	--	0	0	--	2	0	0	0.00252909	0	0
	12 m	10	1	10	0.508223	2	3.93528	0	0	--	0	0	--	1	0	0	0.00394784	0	0
	18 m	36	2	5.55556	1.15783	2	1.72737	1	0	0	0.024674	0	0	0	0	--	0	0	--
CAR08	6 m	0	0	--	0	0	--	0	0	--	0	0	--	0	0	--	0	0	--
	12 m	0	0	--	0	0	--	0	0	--	0	0	--	0	0	--	0	0	--
	18 m	0	0	--	0	0	--	2	0	0	0.169572	0	0	0	0	--	0	0	--
CAR09	6 m	18	3	16.6667	0.517106	4	7.73536	1	0	0	0.00222066	0	0	0	0	--	0	0	--
	12 m	0	0	--	0	0	--	0	0	--	0	0	--	1	0	0	0.00222066	0	0
	18 m	10	0	0	0.238474	0	0	1	1	100	0.0222683	1	44.9069	2	0	0	0.00209729	0	0
CAR11	6 m	0	0	--	0	0	--	0	0	--	0	0	--	0	0	--	0	0	--
	12 m	21	4	19.0476	0.598283	7	11.7001	0	0	--	0	0	--	0	0	--	0	0	--
	18 m	34	1	2.94118	0.411131	1	2.43232	10	5	50	0.992759	8	8.05835	0	0	--	0	0	--
CAR12	6 m	0	0	--	0	0	--	0	0	--	0	0	--	0	0	--	0	0	--
	12 m	0	0	--	0	0	--	0	0	--	0	0	--	0	0	--	0	0	--
	18 m	0	0	--	0	0	--	0	0	--	0	0	--	0	0	--	0	0	--
CAR13	6 m	0	0	--	0	0	--	0	0	--	0	0	--	0	0	--	0	0	--
	12 m	6	0	0	0.150635	0	0	1	1	100	0.166796	3	17.986	1	0	0	0.000555165	0	0
	18 m	4	1	25	0.144898	1	6.9014	0	0	--	0	0	--	1	1	100	0.00302257	1	330.845
CAR14	6 m	14	0	0	0.178948	0	0	0	0	--	0	0	--	1	0	0	0.0157914	0	0
	12 m	20	2	10	0.372454	2	5.36979	2	1	50	0.091849	2	21.7749	0	0	--	0	0	--
	18 m	7	1	14.2857	0.264012	1	3.78771	7	4	57.1429	0.688282	4	5.81158	5	2	40	0.0157297	2	127.148
CAR16	6 m	0	0	--	0	0	--	0	0	--	0	0	--	0	0	--	0	0	--
	12 m	13	2	15.3846	0.449684	2	4.44757	0	0	--	0	0	--	1	1	100	0.00394784	1	253.303
	18 m	22	4	18.1818	0.851809	6	7.04384	13	12	92.3077	0.741577	20	26.9695	0	0	--	0	0	--
CAR17	6 m	0	0	--	0	0	--	0	0	--	0	0	--	0	0	--	0	0	--
	12 m	12	4	33.3333	0.712709	5	7.01549	1	1	100	0.0326314	2	61.2907	0	0	--	0	0	--
	18 m	5	0	0	0.177406	0	0	5	4	80	0.598221	10	16.7162	1	0	0	0.0061685	0	0
CAR18	6 m	0	0	--	0	0	--	0	0	--	0	0	--	0	0	--	0	0	--
	12 m	8	0	0	0.516859	0	0	0	0	--	0	0	--	1	1	100	0.0061685	1	162.114
	18 m	5	0	0	0.175494	0	0	2	2	100	0.127935	2	15.633	2	0	0	0.0387999	0	0
CAR19	6 m	0	0	--	0	0	--	0	0	--	0	0	--	0	0	--	0	0	--
	12 m	15	1	6.66667	0.460849	1	2.16991	0	0	--	0	0	--	3	0	0	0.0252292	0	0
	18 m	14	5	35.7143	2.39375	13	5.43081	0	0	--	0	0	--	2	0	0	0.00672367	0	0
CAR20	6 m	0	0	--	0	0	--	0	0	--	0	0	--	0	0	--	0	0	--
	12 m	0	0	--	0	0	--	0	0	--	0	0	--	1	0	0	0.00154213	0	0
	18 m	4	0	0	0.166365	0	0	0	0	--	0	0	--	0	0	--	0	0	--
CAR21	6 m	0	0	--	0	0	--	0	0	--	0	0	--	0	0	--	0	0	--
	12 m	4	1	25	0.0184438	1	54.2187	0	0	--	0	0	--	0	0	--	0	0	--
	18 m	2	0	0	0.0755025	0	0	6	3	50	0.422542	7	16.5664	1	0	0	0.00394784	0	0
CAR22	6 m	0	0	--	0	0	--	0	0	--	0	0	--	0	0	--	0	0	--
	12 m	6	1	16.6667	0.109984	1	9.0922	2	2	100	0.0320762	2	62.3515	3	1	33.3333	0.00746389	1	133.978
	18 m	27	6	22.2222	0.959572	4	4.16852	4	3	75	0.263703	4	15.1686	0	0	--	0	0	--
CAR23	6 m	3	1	33.3333	0.069334	1	14.4229	0	0	--	0	0	--	0	0	--	0	0	--
	12 m	28	3	10.7143	1.58753	5	3.14955	0	0	--	0	0	--	0	0	--	0	0	--
	18 m	11	0	0	0.588043	0	0	3	2	66.6667	0.181971	4	21.9815	0	0	--	0	0	--
CAR24	6 m	0	0	--	0	0	--	0	0	--	0	0	--	0	0	--	0	0	--
	12 m	7	0	0	0.0760576	0	0	0	0	--	0	0	--	2	0	0	0.00178887	0	0
	18 m	1	0	0	0.0326314	0	0	0	0	--	0	0	--	0	0	--	0	0	--
CAR25	6 m	3	1	33.3333	0.0862357	1	11.5961	0	0	--	0	0	--	0	0	--	0	0	--
	12 m	11	1	9.09091	0.280667	2	7.12589	0	0	--	0	0	--	1	0	0	0.00222066	0	0
	18 m	5	1	20	0.331742	1	3.01439	1	1	100	0.024674	1	40.5285	2	1	50	0.00400953	1	249.406
CAR26	6 m	0	0	--	0	0	--	0	0	--	0	0	--	3	1	33.3333	0.00308425	1	324.228
	12 m	9	1	11.1111	0.593533	2	3.36965	0	0	--	0	0	--	1	0	0	0.00499649	0	0
	18 m	17	0	0	0.801412	0	0	2	2	100	0.125591	2	15.9247	0	0	--	0	0	--
CAR27	6 m	3	0	0	0.0306575	0	0	0	0	--	0	0	--	0	0	--	0	0	--
	12 m	0	0	--	0	0	--	1	1	100	0.0555165	1	18.0127	0	0	--	0	0	--
	18 m	0	0	--	0	0	--	3	2	66.6667	0.101965	2	19.6145	0	0	--	0	0	--
CAR28	6 m	8	0	0	0.260619	0	0	0	0	--	0	0	--	0	0	--	0	0	--
	12 m	24	2	8.33333	1.20557	2	1.65896	1	0	0	0.024674	0	0	2	0	0	0.00801905	0	0
	18 m	5	2	40	0.331495	2	6.03327	4	2	50	0.227803	3	13.1693	0	0	--	0	0	--
CAR29	6 m	4	0	0	0.106838	0	0	0	0	--	0	0	--	0	0	--	0	0	--
	12 m	5	0	0	0.414708	0	0	0	0	--	0	0	--	0	0	--	0	0	--
	18 m	3	0	0	0.151313	0	0	0	0	--	0	0	--	0	0	--	0	0	--
