# Supplementary material for: Occurrence patterns of coral-dwelling gall crabs (Cryptochiridae) over depth intervals in the Caribbean
Source: PeerJ. 2016 Mar 10;4:e1794. doi: 10.7717/peerj.1794 (PMC4793322; doi:10.7717/peerj.1794)
Supplement: Data S2 [file peerj-04-1794-s002.xlsx]

## Sheet: Occurrences Tcor
Locality	Depth	Orbicella franksi						Orbicella faveolata						Orbicella annularis						Dichocoenia stokesii						Diploria labyrinthiformis						Colpophyllia natans						Pseudodiploria strigosa						Pseudodiploria clivosa
		colonies (n)	inh. (n)	inh. (%)	surface (m²)	T. cor (n)	T. cor (d)	colonies (n)	inh. (n)	inh. (%)	surface (m²)	T. cor (n)	T. cor (d)	colonies (n)	inf. (n)	inf. (%)	surface (m²)	T. cor (n)	T. cor (d)	colonies (n)	inh. (n)	inh. (%)	surface (m²)	T. cor (n)	T. cor (d)	colonies (n)	inh. (n)	inh. (%)	surface (m²)	T. cor (n)	T. cor (d)	colonies (n)	inh. (n)	inh. (%)	surface (m²)	T. cor (n)	T. cor (d)	colonies (n)	inh. (n)	inh. (%)	surface (m²)	T. cor (n)	T. cor (d)	colonies (n)	inf. (n)	inf. (%)	surface (m²)	T. cor (n)	T. cor (d)
CAR01	6 m	0	0	--	0	0	--	0	0	--	0	0	--	0	0	--	0	0	--	0	0	--	0	0	--	0	0	--	0	0	--	0	0	--	0	0	--	0	0	--	0	0	--	0	0	--	0	0	--
	12 m	0	0	--	0	0	--	0	0	--	0	0	--	3	0	0	0.0859889	0	0	0	0	--	0	0	--	0	0	--	0	0	--	0	0	--	0	0	--	0	0	--	0	0	--	0	0	--	0	0	--
	18 m	0	0	--	0	0	--	0	0	--	0	0	--	0	0	--	0	0	--	0	0	--	0	0	--	0	0	--	0	0	--	0	0	--	0	0	--	0	0	--	0	0	--	0	0	--	0	0	--
CAR02	6 m	0	0	--	0	0	--	0	0	--	0	0	--	2	0	0	0.017827	0	0	4	0	0	0.0141876	0	0	0	0	--	0	0	--	3	0	0	1.53287	0	0	7	1	14.2857	0.946803	1	1.05619	0	0	--	0	0	--
	12 m	0	0	--	0	0	--	0	0	--	0	0	--	0	0	--	0	0	--	0	0	--	0	0	--	0	0	--	0	0	--	1	1	100	0.746389	1	1.33978	0	0	--	0	0	--	0	0	--	0	0	--
	18 m	0	0	--	0	0	--	0	0	--	0	0	--	3	0	0	0.00826579	0	0	0	0	--	0	0	--	0	0	--	0	0	--	0	0	--	0	0	--	1	0	0	0.0138791	0	0	0	0	--	0	0	--
CAR03	6 m	0	0	--	0	0	--	2	0	0	0.00252909	0	0	18	4	22.2222	0.163959	5	30.4955	1	1	100	0.0385531	1	25.9382	1	0	0	0.0385531	0	0	0	0	--	0	0	--	1	0	0	0.0061685	0	0	1	0	0	0.024674	0	0
	12 m	0	0	--	0	0	--	0	0	--	0	0	--	0	0	--	0	0	--	0	0	--	0	0	--	0	0	--	0	0	--	0	0	--	0	0	--	0	0	--	0	0	--	0	0	--	0	0	--
	18 m	0	0	--	0	0	--	1	1	100	0.017827	1	56.0948	2	2	100	0.152054	6	39.4598	1	0	0	0.00888264	0	0	1	0	0	0.00222066	0	0	0	0	--	0	0	--	0	0	--	0	0	--	0	0	--	0	0	--
CAR04	6 m	0	0	--	0	0	--	0	0	--	0	0	--	8	5	62.5	0.113254	5	44.1487	0	0	--	0	0	--	3	1	33.3333	0.0230702	1	43.346	0	0	--	0	0	--	7	0	0	0.180429	0	0	1	0	0	0.017827	0	0
	12 m	0	0	--	0	0	--	6	0	0	0.336183	0	0	3	1	33.3333	0.241312	1	4.14402	0	0	--	0	0	--	0	0	--	0	0	--	0	0	--	0	0	--	0	0	--	0	0	--	0	0	--	0	0	--
	18 m	0	0	--	0	0	--	0	0	--	0	0	--	0	0	--	0	0	--	0	0	--	0	0	--	0	0	--	0	0	--	0	0	--	0	0	--	0	0	--	0	0	--	0	0	--	0	0	--
CAR05	6 m	0	0	--	0	0	--	0	0	--	0	0	--	14	3	21.4286	0.654602	3	4.58294	0	0	--	0	0	--	0	0	--	0	0	--	0	0	--	0	0	--	0	0	--	0	0	--	0	0	--	0	0	--
	12 m	0	0	--	0	0	--	4	1	25	0.115659	1	8.64607	0	0	--	0	0	--	0	0	--	0	0	--	0	0	--	0	0	--	0	0	--	0	0	--	0	0	--	0	0	--	0	0	--	0	0	--
	18 m	0	0	--	0	0	--	10	1	10	0.535179	2	3.73707	0	0	--	0	0	--	0	0	--	0	0	--	1	0	0	0.00302257	0	0	3	0	0	0.305341	0	0	0	0	--	0	0	--	0	0	--	0	0	--
CAR06	6 m	0	0	--	0	0	--	0	0	--	0	0	--	7	3	42.8571	0.276904	4	14.4454	0	0	--	0	0	--	2	0	0	0.119237	0	0	3	1	33.3333	0.02233	3	134.349	13	6	46.1538	1.80435	15	8.31325	0	0	--	0	0	--
	12 m	0	0	--	0	0	--	0	0	--	0	0	--	4	0	0	0.0968455	0	0	0	0	--	0	0	--	0	0	--	0	0	--	1	0	0	0.0199859	0	0	2	0	0	0.137249	0	0	0	0	--	0	0	--
	18 m	0	0	--	0	0	--	0	0	--	0	0	--	2	0	0	0.0328781	0	0	0	0	--	0	0	--	0	0	--	0	0	--	0	0	--	0	0	--	0	0	--	0	0	--	0	0	--	0	0	--
CAR07	6 m	0	0	--	0	0	--	5	0	0	1.34097	0	0	8	1	12.5	0.301455	1	3.31725	0	0	--	0	0	--	0	0	--	0	0	--	0	0	--	0	0	--	0	0	--	0	0	--	0	0	--	0	0	--
	12 m	0	0	--	0	0	--	10	1	10	1.98169	2	1.00924	6	1	16.6667	0.0926509	1	10.7932	0	0	--	0	0	--	1	0	0	0.0483611	0	0	1	0	0	0.41477	0	0	0	0	--	0	0	--	0	0	--	0	0	--
	18 m	1	1	100	0.0416991	1	23.9813	4	2	50	0.0835215	2	23.9459	2	0	0	0.0160998	0	0	0	0	--	0	0	--	0	0	--	0	0	--	2	0	0	2.12005	0	0	1	0	0	0.0138791	0	0	0	0	--	0	0	--
CAR08	6 m	0	0	--	0	0	--	0	0	--	0	0	--	0	0	--	0	0	--	0	0	--	0	0	--	2	0	0	0.00999297	0	0	0	0	--	0	0	--	3	0	0	0.0455236	0	0	0	0	--	0	0	--
	12 m	0	0	--	0	0	--	0	0	--	0	0	--	0	0	--	0	0	--	0	0	--	0	0	--	0	0	--	0	0	--	0	0	--	0	0	--	0	0	--	0	0	--	0	0	--	0	0	--
	18 m	0	0	--	0	0	--	1	1	100	0.456222	3	6.57574	3	3	100	0.0456469	5	109.536	0	0	--	0	0	--	0	0	--	0	0	--	0	0	--	0	0	--	0	0	--	0	0	--	0	0	--	0	0	--
CAR09	6 m	3	1	33.3333	0.467819	1	2.13758	0	0	--	0	0	--	1	0	0	0.00302257	0	0	0	0	--	0	0	--	0	0	--	0	0	--	0	0	--	0	0	--	0	0	--	0	0	--	0	0	--	0	0	--
	12 m	1	0	0	0.0104248	0	0	0	0	--	0	0	--	12	0	0	0.130587	0	0	0	0	--	0	0	--	0	0	--	0	0	--	0	0	--	0	0	--	2	1	50	0.024489	1	40.8347	0	0	--	0	0	--
	18 m	3	0	0	0.271414	0	0	0	0	--	0	0	--	6	0	0	0.276226	0	0	0	0	--	0	0	--	1	0	0	0.0483611	0	0	1	0	0	0.0631655	0	0	0	0	--	0	0	--	0	0	--	0	0	--
CAR11	6 m	0	0	--	0	0	--	0	0	--	0	0	--	5	3	60	0.103076	3	29.1048	0	0	--	0	0	--	1	1	100	0.0326314	1	30.6453	0	0	--	0	0	--	0	0	--	0	0	--	1	1	100	0.0518771	1	19.2763
	12 m	6	5	83.3333	0.505077	9	17.8191	0	0	--	0	0	--	3	1	33.3333	0.0943164	1	10.6026	0	0	--	0	0	--	0	0	--	0	0	--	0	0	--	0	0	--	0	0	--	0	0	--	0	0	--	0	0	--
	18 m	5	3	60	0.425133	4	9.40882	0	0	--	0	0	--	0	0	--	0	0	--	0	0	--	0	0	--	0	0	--	0	0	--	1	0	0	0.207508	0	0	0	0	--	0	0	--	0	0	--	0	0	--
CAR12	6 m	0	0	--	0	0	--	0	0	--	0	0	--	0	0	--	0	0	--	0	0	--	0	0	--	3	0	0	0.0695807	0	0	0	0	--	0	0	--	1	0	0	0.00394784	0	0	0	0	--	0	0	--
	12 m	1	1	100	0.0157914	1	63.3257	0	0	--	0	0	--	0	0	--	0	0	--	0	0	--	0	0	--	0	0	--	0	0	--	0	0	--	0	0	--	0	0	--	0	0	--	0	0	--	0	0	--
	18 m	0	0	--	0	0	--	0	0	--	0	0	--	0	0	--	0	0	--	0	0	--	0	0	--	1	0	0	0.0326314	0	0	0	0	--	0	0	--	0	0	--	0	0	--	0	0	--	0	0	--
CAR13	6 m	0	0	--	0	0	--	0	0	--	0	0	--	23	2	8.69565	0.64868	2	3.08319	0	0	--	0	0	--	0	0	--	0	0	--	0	0	--	0	0	--	0	0	--	0	0	--	0	0	--	0	0	--
	12 m	1	1	100	0.166796	1	5.99534	0	0	--	0	0	--	6	0	0	0.078525	0	0	0	0	--	0	0	--	0	0	--	0	0	--	3	1	33.3333	0.216453	1	4.61995	0	0	--	0	0	--	0	0	--	0	0	--
	18 m	0	0	--	0	0	--	0	0	--	0	0	--	3	0	0	0.12226	0	0	0	0	--	0	0	--	0	0	--	0	0	--	0	0	--	0	0	--	0	0	--	0	0	--	0	0	--	0	0	--
CAR14	6 m	1	0	0	0.0120903	0	0	0	0	--	0	0	--	4	1	25	0.067175	1	14.8865	0	0	--	0	0	--	0	0	--	0	0	--	1	0	0	0.963829	0	0	0	0	--	0	0	--	0	0	--	0	0	--
	12 m	10	2	20	0.170374	3	17.6083	2	0	0	0.101719	0	0	1	0	0	0.017827	0	0	0	0	--	0	0	--	0	0	--	0	0	--	1	1	100	0.024674	1	40.5285	0	0	--	0	0	--	0	0	--	0	0	--
	18 m	4	0	0	0.0402803	0	0	0	0	--	0	0	--	3	0	0	0.0835832	0	0	0	0	--	0	0	--	0	0	--	0	0	--	0	0	--	0	0	--	0	0	--	0	0	--	0	0	--	0	0	--
CAR16	6 m	2	1	50	0.162417	2	12.314	1	0	0	0.0326314	0	0	9	0	0	0.123925	0	0	0	0	--	0	0	--	0	0	--	0	0	--	1	1	100	0.556707	1	1.79628	0	0	--	0	0	--	0	0	--	0	0	--
	12 m	2	2	100	0.0476825	3	62.9161	0	0	--	0	0	--	19	4	21.0526	0.131389	5	38.0549	0	0	--	0	0	--	1	0	0	0.017827	0	0	0	0	--	0	0	--	0	0	--	0	0	--	0	0	--	0	0	--
	18 m	8	6	75	2.20851	10	4.52794	5	1	20	0.326005	1	3.06743	2	1	50	0.166796	1	5.99534	0	0	--	0	0	--	0	0	--	0	0	--	1	0	0	0.466894	0	0	1	0	0	0.186597	0	0	0	0	--	0	0	--
CAR17	6 m	0	0	--	0	0	--	1	0	0	0.337787	0	0	1	0	0	0.0518771	0	0	0	0	--	0	0	--	1	0	0	0.222066	0	0	0	0	--	0	0	--	0	0	--	0	0	--	0	0	--	0	0	--
	12 m	1	1	100	0.0385531	1	25.9382	0	0	--	0	0	--	0	0	--	0	0	--	0	0	--	0	0	--	0	0	--	0	0	--	0	0	--	0	0	--	0	0	--	0	0	--	0	0	--	0	0	--
	18 m	4	2	50	0.1457	2	13.7268	2	2	100	0.255869	2	7.81648	0	0	--	0	0	--	0	0	--	0	0	--	0	0	--	0	0	--	0	0	--	0	0	--	0	0	--	0	0	--	0	0	--	0	0	--
CAR18	6 m	0	0	--	0	0	--	0	0	--	0	0	--	2	0	0	0.301578	0	0	0	0	--	0	0	--	0	0	--	0	0	--	0	0	--	0	0	--	1	0	0	0.00394784	0	0	0	0	--	0	0	--
	12 m	10	2	20	4.3066	3	0.696605	0	0	--	0	0	--	0	0	--	0	0	--	0	0	--	0	0	--	0	0	--	0	0	--	0	0	--	0	0	--	0	0	--	0	0	--	0	0	--	0	0	--
	18 m	7	3	42.8571	1.05796	5	4.72608	2	2	100	0.255869	2	7.81648	0	0	--	0	0	--	0	0	--	0	0	--	0	0	--	0	0	--	0	0	--	0	0	--	0	0	--	0	0	--	0	0	--	0	0	--
CAR19	6 m	0	0	--	0	0	--	0	0	--	0	0	--	0	0	--	0	0	--	0	0	--	0	0	--	0	0	--	0	0	--	0	0	--	0	0	--	4	0	0	0.370419	0	0	0	0	--	0	0	--
	12 m	3	0	0	0.366409	0	0	0	0	--	0	0	--	0	0	--	0	0	--	0	0	--	0	0	--	0	0	--	0	0	--	1	0	0	0.130526	0	0	0	0	--	0	0	--	0	0	--	0	0	--
	18 m	10	0	0	1.54225	0	0	0	0	--	0	0	--	2	0	0	0.0197392	0	0	0	0	--	0	0	--	0	0	--	0	0	--	0	0	--	0	0	--	0	0	--	0	0	--	0	0	--	0	0	--
CAR20	6 m	0	0	--	0	0	--	4	1	25	0.428711	3	6.99772	5	3	60	0.468806	8	17.0646	1	0	0	0.00222066	0	0	0	0	--	0	0	--	1	1	100	0.124912	1	8.00562	3	2	66.6667	0.0632272	4	63.264	0	0	--	0	0	--
	12 m	0	0	--	0	0	--	2	0	0	0.34081	0	0	22	7	31.8182	0.619749	8	12.9084	0	0	--	0	0	--	0	0	--	0	0	--	2	0	0	0.232182	0	0	0	0	--	0	0	--	0	0	--	0	0	--
	18 m	0	0	--	0	0	--	0	0	--	0	0	--	0	0	--	0	0	--	0	0	--	0	0	--	0	0	--	0	0	--	1	0	0	0.499649	0	0	0	0	--	0	0	--	0	0	--	0	0	--
CAR21	6 m	0	0	--	0	0	--	4	0	0	0.259077	0	0	3	1	33.3333	0.0678535	1	14.7376	0	0	--	0	0	--	0	0	--	0	0	--	0	0	--	0	0	--	0	0	--	0	0	--	0	0	--	0	0	--
	12 m	2	0	0	1.26609	0	0	0	0	--	0	0	--	2	0	0	0.00771063	0	0	0	0	--	0	0	--	0	0	--	0	0	--	1	0	0	0.098696	0	0	0	0	--	0	0	--	0	0	--	0	0	--
	18 m	0	0	--	0	0	--	0	0	--	0	0	--	2	0	0	0.00715546	0	0	0	0	--	0	0	--	0	0	--	0	0	--	0	0	--	0	0	--	0	0	--	0	0	--	0	0	--	0	0	--
CAR22	6 m	0	0	--	0	0	--	0	0	--	0	0	--	0	0	--	0	0	--	0	0	--	0	0	--	0	0	--	0	0	--	0	0	--	0	0	--	0	0	--	0	0	--	0	0	--	0	0	--
	12 m	0	0	--	0	0	--	0	0	--	0	0	--	2	0	0	0.0385531	0	0	0	0	--	0	0	--	0	0	--	0	0	--	0	0	--	0	0	--	0	0	--	0	0	--	0	0	--	0	0	--
	18 m	2	2	100	0.524323	4	7.62889	0	0	--	0	0	--	3	1	33.3333	0.0275115	1	36.3484	0	0	--	0	0	--	0	0	--	0	0	--	1	0	0	0.098696	0	0	0	0	--	0	0	--	0	0	--	0	0	--
CAR23	6 m	0	0	--	0	0	--	0	0	--	0	0	--	2	1	50	0.00548997	7	1275.05	0	0	--	0	0	--	0	0	--	0	0	--	0	0	--	0	0	--	1	0	0	0.0104248	0	0	0	0	--	0	0	--
	12 m	1	1	100	0.0199859	1	50.0352	7	2	28.5714	0.0902452	2	22.1618	0	0	--	0	0	--	0	0	--	0	0	--	0	0	--	0	0	--	0	0	--	0	0	--	0	0	--	0	0	--	0	0	--	0	0	--
	18 m	0	0	--	0	0	--	0	0	--	0	0	--	3	2	66.6667	0.323846	4	12.3515	0	0	--	0	0	--	0	0	--	0	0	--	1	0	0	0.0157914	0	0	0	0	--	0	0	--	0	0	--	0	0	--
CAR24	6 m	0	0	--	0	0	--	0	0	--	0	0	--	12	5	41.6667	0.343092	11	32.0614	0	0	--	0	0	--	0	0	--	0	0	--	0	0	--	0	0	--	0	0	--	0	0	--	0	0	--	0	0	--
	12 m	1	1	100	0.0222683	1	44.9069	1	0	0	0.858902	0	0	18	2	11.1111	0.195233	2	10.2442	0	0	--	0	0	--	0	0	--	0	0	--	0	0	--	0	0	--	0	0	--	0	0	--	0	0	--	0	0	--
	18 m	1	0	0	0.0157914	0	0	0	0	--	0	0	--	0	0	--	0	0	--	0	0	--	0	0	--	1	0	0	0.0138791	0	0	0	0	--	0	0	--	0	0	--	0	0	--	0	0	--	0	0	--
CAR25	6 m	0	0	--	0	0	--	0	0	--	0	0	--	1	0	0	0.0061685	0	0	0	0	--	0	0	--	2	1	50	0.0262161	1	38.1444	0	0	--	0	0	--	4	0	0	0.153719	0	0	2	2	100	0.0755642	3	39.7014
	12 m	1	0	0	0.160443	0	0	1	0	0	0.130526	0	0	0	0	--	0	0	--	0	0	--	0	0	--	0	0	--	0	0	--	0	0	--	0	0	--	0	0	--	0	0	--	0	0	--	0	0	--
	18 m	12	3	25	1.80114	3	1.66561	3	0	0	0.155631	0	0	0	0	--	0	0	--	0	0	--	0	0	--	1	0	0	0.0138791	0	0	0	0	--	0	0	--	0	0	--	0	0	--	0	0	--	0	0	--
CAR26	6 m	0	0	--	0	0	--	0	0	--	0	0	--	2	0	0	0.012337	0	0	0	0	--	0	0	--	0	0	--	0	0	--	0	0	--	0	0	--	0	0	--	0	0	--	0	0	--	0	0	--
	12 m	3	1	33.3333	0.116646	1	8.57292	7	2	28.5714	0.694327	2	2.88049	17	8	47.0588	0.583232	12	20.575	0	0	--	0	0	--	0	0	--	0	0	--	4	1	25	0.798019	2	2.50621	0	0	--	0	0	--	0	0	--	0	0	--
	18 m	9	5	55.5556	0.596247	5	8.38578	0	0	--	0	0	--	3	1	33.3333	0.416621	1	2.40026	0	0	--	0	0	--	0	0	--	0	0	--	1	0	0	0.0326314	0	0	0	0	--	0	0	--	0	0	--	0	0	--
CAR27	6 m	0	0	--	0	0	--	0	0	--	0	0	--	0	0	--	0	0	--	0	0	--	0	0	--	2	0	0	0.0114117	0	0	0	0	--	0	0	--	6	1	16.6667	0.142801	2	14.0055	0	0	--	0	0	--
	12 m	5	1	20	0.520005	2	3.84612	0	0	--	0	0	--	0	0	--	0	0	--	0	0	--	0	0	--	0	0	--	0	0	--	3	0	0	0.677857	0	0	0	0	--	0	0	--	0	0	--	0	0	--
	18 m	0	0	--	0	0	--	0	0	--	0	0	--	0	0	--	0	0	--	0	0	--	0	0	--	0	0	--	0	0	--	0	0	--	0	0	--	0	0	--	0	0	--	0	0	--	0	0	--
CAR28	6 m	0	0	--	0	0	--	9	3	33.3333	2.09748	4	1.90705	7	2	28.5714	0.900786	2	2.22028	0	0	--	0	0	--	0	0	--	0	0	--	7	1	14.2857	1.06074	2	1.88548	5	2	40	0.476455	8	16.7907	0	0	--	0	0	--
	12 m	1	0	0	0.0138791	0	0	7	5	71.4286	1.14037	10	8.76908	12	1	8.33333	0.205843	1	4.85807	0	0	--	0	0	--	0	0	--	0	0	--	9	2	22.2222	0.822261	2	2.43232	0	0	--	0	0	--	0	0	--	0	0	--
	18 m	4	2	50	0.042501	2	47.0577	2	2	100	0.555782	2	3.59853	1	1	100	0.319775	1	3.1272	0	0	--	0	0	--	0	0	--	0	0	--	0	0	--	0	0	--	0	0	--	0	0	--	0	0	--	0	0	--
CAR29	6 m	0	0	--	0	0	--	3	0	0	0.677055	0	0	25	2	8	0.770446	2	2.5959	0	0	--	0	0	--	0	0	--	0	0	--	3	1	33.3333	0.404715	1	2.47087	1	0	0	0.0483611	0	0	0	0	--	0	0	--
	12 m	1	1	100	0.719494	1	1.38987	0	0	--	0	0	--	3	0	0	0.0519388	0	0	0	0	--	0	0	--	0	0	--	0	0	--	2	1	50	2.70655	1	0.369474	1	0	0	0.0120903	0	0	0	0	--	0	0	--
	18 m	0	0	--	0	0	--	0	0	--	0	0	--	0	0	--	0	0	--	0	0	--	0	0	--	0	0	--	0	0	--	0	0	--	0	0	--	0	0	--	0	0	--	1	0	0	0.00888264	0	0
[truncated: 12 more columns]
